# Supplementary material for: MMP9 modulates the metastatic cascade and immune landscape for breast cancer anti-metastatic therapy
Source: Life Sci Alliance. 2019 Nov 14;2(6):e201800226. doi: 10.26508/lsa.201800226 (PMC6856766; doi:10.26508/lsa.201800226)
Supplement: Supplementary file 9 [file LSA-2018-00226_TableS1.xlsx]

## Sheet: Sheet1
		RT-PCR Primer List - Mouse
		Gene	Forward Primer (5' --> 3')	Reverse Primer (5' --> 3')
		Alk-5	CGTTACAGTGTTTCTGCCACCT	AGACGAAGCACACTGGTCCAGC
		b-Catenin	TGGACCCTATGATGGAGCATG	GGTCAGTATCAAACCAGGCCAG
		c-Myc	CGGACACACAACGTCTTGGAA	AGGATGTAGGCGGTGGCTTTT
		Caspace 3	TGACTGGAAAGCCGAAACTC	AGCCTCCACCGGTATCTTCTC
		Caspase 8	CCGAGCTGGACTTGTGACC	CTGCCCAGTTCTTCAGCAAT
		Caspase 9	AGTTCCCGGGTGCTGTCTAT	GCCATGGTCTTTCTGCTCAC
		Ctla-4	TTTTGTAGCCCTGCTCACTCT	CTGAAGGTTGGGTCACCTGTA
		e-Cadherin	CACCTGGAGAGAGGCCATGT	TGGGAAACATGAGCAGCTCT
		Fibronectin	AAACTTGCATCTGGAGGCAAACCC	AGCTCTGATCAGCATGGACCACTT
		Gfp	AAGTTCATCTGCACCACCG	TCCTTGAAGAAGATGGTGCG
		Ifng	TCAAGTGGCATAGATGTGGAAGAA	TGGCTCTGCAGGATTTTCATG
		Ifngr	CTGGCAGGATGATTCTGCTGG	GCATACGACAGGGTTCAAGTTAT
		Il-1beta	CACAGCAGCACATCAACAAG	GTGCTCATGTCCTCATCCTG
		Il-2	CCTGAGCAGGATGGAGAATTACA	TCCAGAACATGCCGCAGAG
		Il-4	AACGAGGTCACAGGAGAAGG	TCTGCAGCTCCATGAGAACA
		Il-4r	GATCAACATCCTGATGTCAGG	GGCCTCAAACAGCTCCATACAG
		Il-12	AAGCTCTGCATCCTGCTTCAC	GATAGCCCATCACCCTGTTGA
		Il-13	GCAGCATGGTATGGAGTGTG	TGGCGAAACAGTTGCTTTGT
		Il-13ra1	TCAGCCACCTGTGACGAATTT	TGAGAGTGCAATTTGGACTGG
		Il-17	TCTCCACCGCAATGAAGACC	CACACCCACCAGCATCTTCT
		Il-17ra	TCAGCCACCTGTGACGAATTT	TGAGAGTGCAATTTGGACTGG
		Il-23	CCTTCTCCGTTCCAAGATCCT	ACTAAGGGCTCAGTCAGAGTTGCT
		Ki67	ATCATTGACCGCTCCTTTAGGT	GCTCGCCTTGATGGTTCCT
		Lgr5	ACATTCCCAAGGGAGCGTTC	ATGTGGTTGGCATCTAGGCG
		Lgr6	ATCATGCTGTCCGCTGACTG	ACTGAGGTCTAGGTAAGCCGT
		Lox	TGCCAGTGGATTGATATTACAGATGT	AGCGAATGTCACAGCGTACAA
		Loxl4	TGGTGACCTGTCGGCAACT	GAACTCCACTCATCACCACTTCTTT
		Mmp2	CAGGGAATGAGTACTGGGTCTATT	ACTCCAGTTAAAGGCAGCATCTAC
		Mmp3	CAGACTTGTCCCGTTTCCAT	GGTGCTGACTGCATCAAAGA
		Mmp9	AACATCTGGCACTCCACACC	GCAGAAGTTCTTTGGCCTGC
		Mmp14	CAGTATGGCTACCTACCTCCAG	GCCTTGCCTGTCACTTGTAAA
		Pd-1	CAGCTTGTCCAACTGGTCG	GCTCAAACCATTACAGAAGGCG
		Pd-l1	AAATGGAACCTGGCGAAAGC	GATGAGCCCCTCAGGCATTT
		Pdgfc	GAAGTGTTTTAGGACGCTGGT	AGAATCCGGGTTCAGATGGAA
		Periostin	CACGGCATGGTTATTCCTTCA	TCAGGACACGGTCAATGACAT
		Plgf	AGTGGAAGTGGTGCCTTTCAA	GTGAGACACCTCATCAGGGTA
		Sox2	AAGAAAGGAGAGAAGTTTGGAGCC	GAGATCTGGCGGAGAATAGTTGG
		Tenascin-C	TTTGCCCTCACTCCCGAAG	AGGGTCATGTTTAGCCCACTC
		Tgfb1	CCACCTGCAAGACCATCGAC	CTGGCGAGCCTTAGTTTGGAC
		Tgfb2	CCATCCCGCCCACTTTCTAC	TCTGGTTTTCACAACCTTGCT
		Tgfb2r	GGAAGTCTGCGTGGCCGTGTGG	CTATGGCAATCCCCAGCGGAGG
		Tgfb3	GGACTTCGGCCACATCAAGAA	TAGGGGACGTGGGTCATCAC
		Tsk-7L	AGATGAGAAGCCCAAGGTCAAC	GGTACCATACTCCACGTCTCTG
		Vegfa	GCACATAGGAGAGATGAGCTTCC	CTCCGCTCTGAACAAGGCT
		Vegfb	GCCAGACAGGGTTGCCATAC	GGAGTGGGATGGATGATGTCAG
		VegfR1	ACATTGGTGGTGGCTGACTCTC	CCTCTCCTTCGGCTGGCATC
		Versican	GCCGCCTATGAGGATGGATTT	TGTCTCCGTAACAGCCCTCTC
		Vimentin	CGGCTGCGAGAGAAATTGC	CCACTTTCCGTTCAAGGTCAAG
		GAPDH	TGCACCACCAACTGCTTAG	GGATGCAGGGATGATGTTC
		Actin	GGCTGTATTCCCCTCCATCG	CCAGTTGGTAACAATGCCATG
