# Supplementary material for: MMP9 modulates the metastatic cascade and immune landscape for breast cancer anti-metastatic therapy
Source: Life Sci Alliance. 2019 Nov 14;2(6):e201800226. doi: 10.26508/lsa.201800226 (PMC6856766; doi:10.26508/lsa.201800226)
Supplement: Supplementary file 10 [file LSA-2018-00226_TableS2.xlsx]

## Sheet: Sheet1
		Flow Cytometry Antibodies
		Antibody	Clone	Channel	Dilution	Company
		CD3	145-2C11	FITC	1:100	Biolegend
		CD4	GK1.5	PeCy7	1:100	Biolegend
		CD8	53-6.7	FITC	1:200	Tonbo
		CD11b	M1/70	PE	1:500	Biolegend
		CD11c	N418	BV605	1:200	Biolegend
		CD24	M1/69	PeCy7	1:200	Biolegend
		CD25	PC61	BUV395	1:200	BD Bioscience
		CD45	30-F11	A700/PE	1:100	Biolegend
		CD45R	RA3-6B2	BV785	1:400	eBioscience
		CD103	2EY	PerCpCy5.5	1:200	Biolegend
		CD279 (PD-1)	29F.1A12	BV421	1:50	Biolegend
		CD278 (ICOS)	C398-4A	BV605	1:100	Biolegend
		F4/80	BM8	BV510	1:200	Biolegend
		FoxP3	FJK-165	APC	01:50:00	Biolegend
		IFNy	XM61.2	BV510	1:50	Biolegend
		Ly6C	HK1.4	BV711	1:500	Biolegend
		Ly6G	1A8	A647	1:200	Biolegend
		MHC Class II	M5/114.15.2	BV421	1:500	Biolegend
		Siglec F	E50-2440	A647	1:200	BD Bioscience
		TCRb	H51-597	PerCpCy5.5	1:100	Tonbo
